# Supplementary material
Source: PubMed Central journal article supplement (PMC8643712)
Supplement: NIHMS1753001-supplement-Supplementary_Material.pdf [file NIHMS1753001-supplement-Supplementary_Material.pdf]

# **SUPPLEMENTARY INFORMATION**

## **CLINICAL OUTCOMES AND SURVIVAL FOLLOWING LUNG TRANSPLANTATION IN PATIENTS WITH PULMONARY LANGERHANS CELL HISTIOCYTOSIS**

Nikolai Wajda, MD<sup>1,2</sup>, Zheng Zhu MS<sup>3</sup>, Roman Jandarov, PhD<sup>3</sup>, Daniel F. Dilling, MD<sup>4</sup> and

Nishant Gupta, MD, MS<sup>1</sup>

1) Division of Pulmonary, Critical Care, and Sleep Medicine

University of Cincinnati Medical Center, Cincinnati, OH, USA

2) Medical Service, Department of Veterans Affairs, Cincinnati, OH, USA

3) Department of Environmental Health

University of Cincinnati, Cincinnati, OH, USA

4) Division of Pulmonary and Critical Care

Loyola University Chicago, Stritch School of Medicine, Maywood, IL, USA

**Figure S1:** Kaplan-Meier curve demonstrating probability of conditional survival, assessed after excluding patients who had died in the first 12 months following LT, in PLCH patients compared with non-PLCH patients.

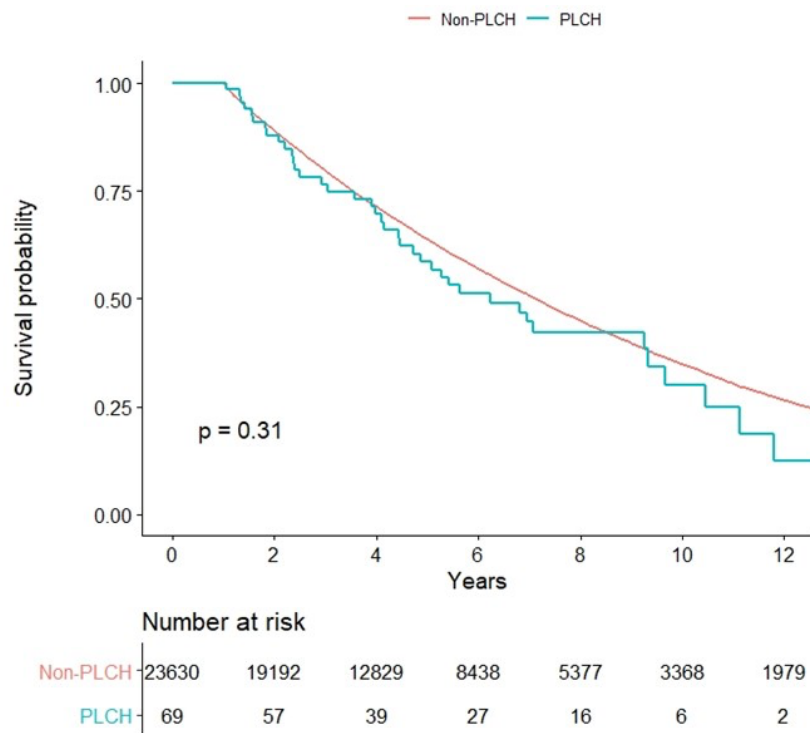

The comparisons were performed using log-rank test. There was no statistically significant difference between the two groups: median conditional survival 6.2 years in PLCH vs. 7.1 years in non-PLCH patients ( $p=0.31$ ).

**Figure S2:** Kaplan-Meier curve demonstrating probability of conditional survival, assessed after excluding patients who had died in the first 12 months following LT, in female PLCH patients compared with male patients.

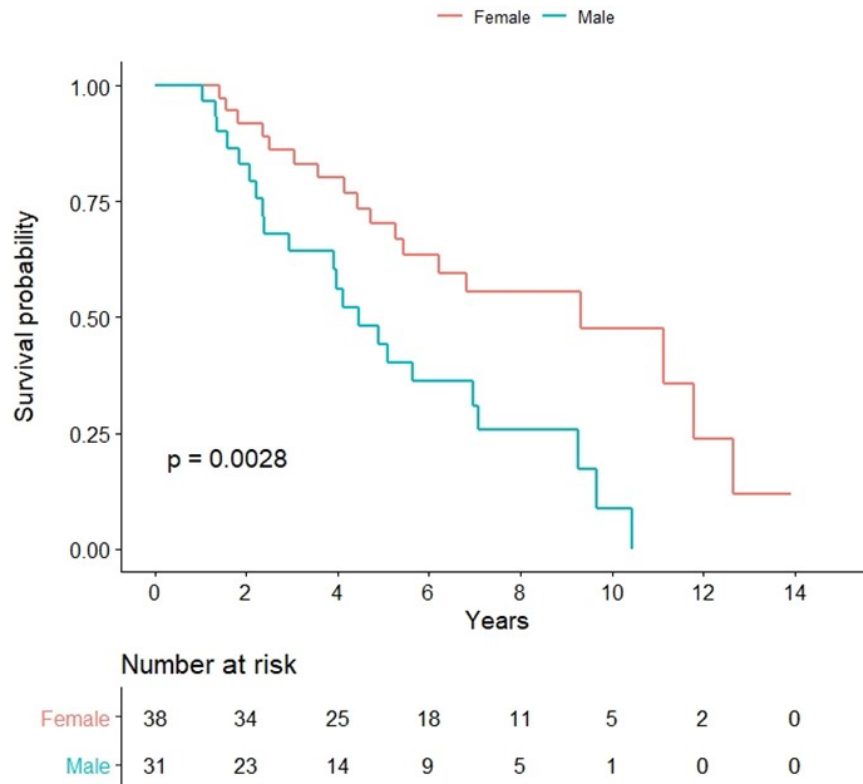

The comparisons were performed using log-rank test. There was a statistically significant difference between the two groups: median conditional survival 9.3 years in female transplant recipients vs. 4.5 years in male transplant patients ( $p=0.003$ ).

**Figure S3:** Kaplan-Meier curve demonstrating the probability of survival following primary lung transplantation in patents with PLCH after segregating the cohort on the basis of type of lung transplant: single LT versus bilateral sequential LT.

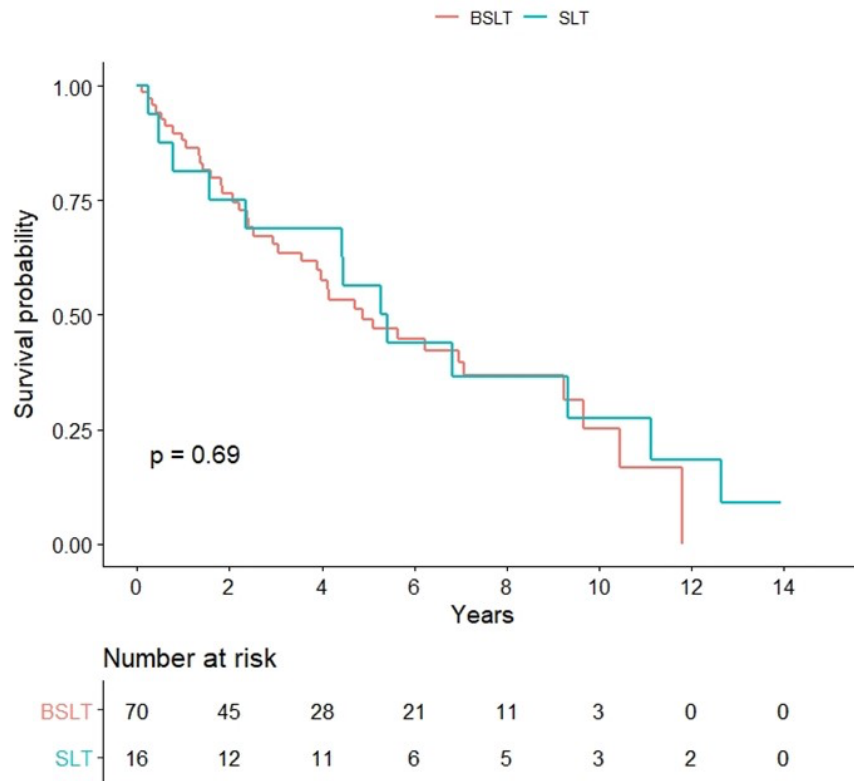

The comparisons were performed using the log-rank test. There was no statistically significant difference found between the two groups: median survival 4.9 years in patients with single lung transplant as compared to 5.4 years in patients with bilateral sequential lung transplant ( $p=0.69$ ).

**Figure S4:** Kaplan-Meier curve demonstrating the probability of survival following primary lung transplantation in patents with PLCH after segregating the cohort on the basis of presence or absence of pulmonary hypertension, defined by mean pulmonary artery pressure  $\geq 25$ mmHg determined by right heart catheterization.

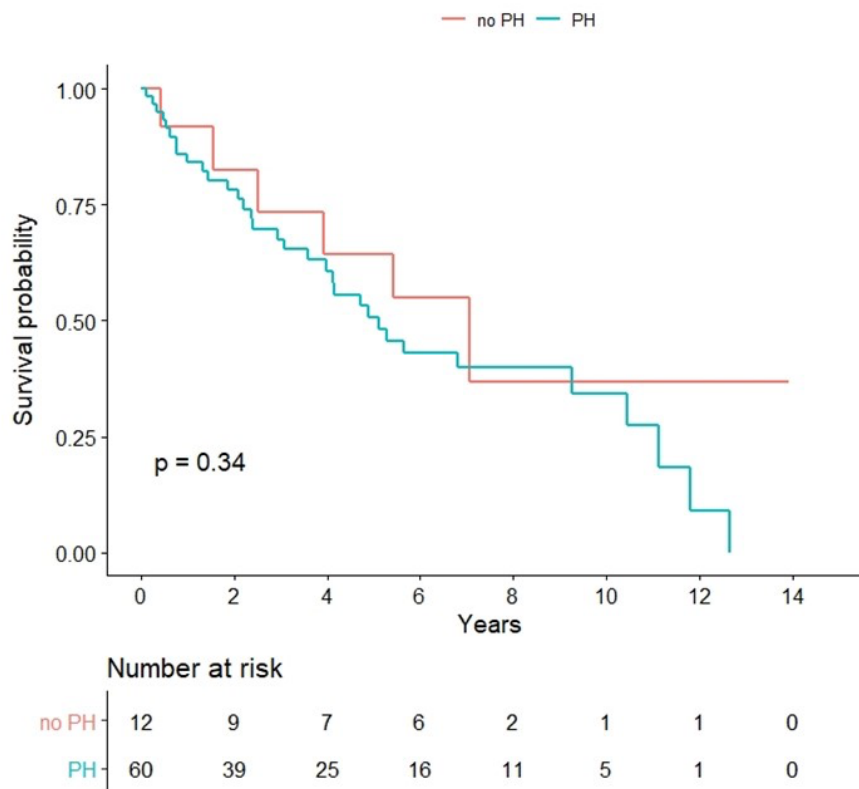

The comparisons were performed using the log-rank test. There was no statistically significant difference found between the two groups: median survival of 5.1 years in patients with pulmonary hypertension compared with median survival of 7.1 years in patients without pulmonary hypertension (p=0.34).

**Figure S5:** Kaplan-Meier curve demonstrating the probability of survival following primary lung transplantation in patents with PLCH after segregating the cohort on the basis of time of lung transplant: before institution of the lung allocation score (LAS) system versus post-LAS.

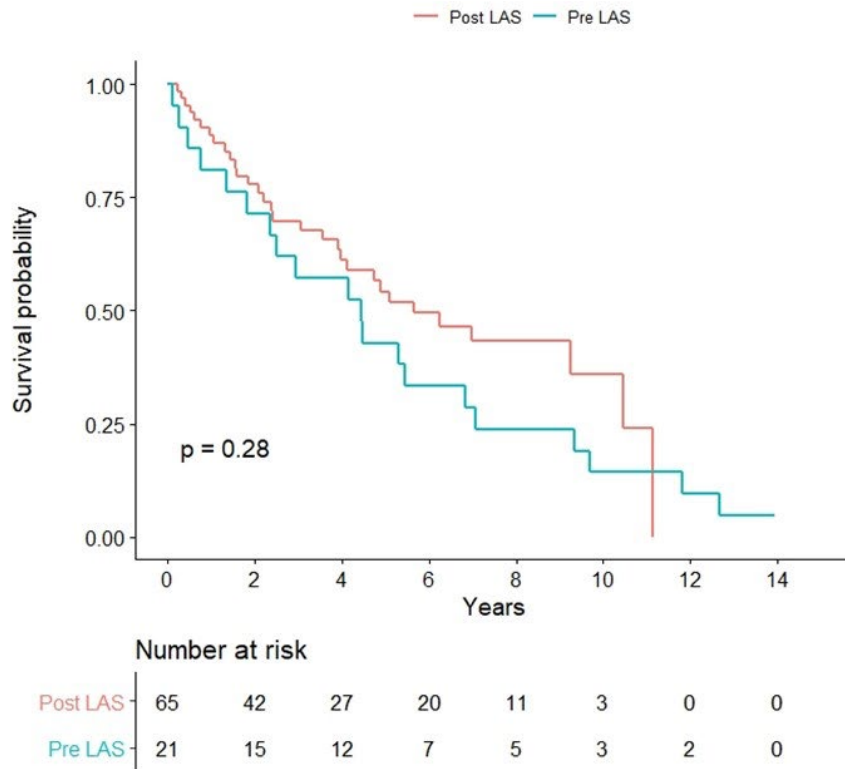

The comparisons were performed using the log-rank test. There was no statistically significant difference found between the two groups: median survival before institution of the LAS system was 4.5 years as compared with post-LAS median survival of 5.6 years ( $p=0.28$ ).

**Table S1:** Details regarding the development of bronchiolitis obliterans post lung transplantation in our cohort.

| <b>Variable</b>                      | <b>N (%)</b> |
|--------------------------------------|--------------|
| No BOS                               | 33 (42%)     |
| BOS at any time                      | 45 (58%)     |
| <b>BOS Grade at diagnosis (n=45)</b> |              |
| Grade 0p                             | 11 (24%)     |
| Grade 1                              | 4 (9%)       |
| Grade 2                              | 3 (7%)       |
| Grade 3                              | 8 (18%)      |
| Grade unknown                        | 19 (42%)     |

Data regarding BOS was available in 78 patients.

**Abbreviations:** BOS = Bronchiolitis obliterans syndrome

**Table S2:** Details regarding the timing and cause of death post lung transplantation in our cohort.

| <b>Pt. No.</b> | <b>Date of Transplant</b> | <b>Gender</b> | <b>Type of transplant</b> | <b>Survival</b> | <b>Cause of Death</b>              |
|----------------|---------------------------|---------------|---------------------------|-----------------|------------------------------------|
| 1              | 2/9/1996                  | Male          | BSLT                      | 39 days         | Pulmonary dehiscence               |
| 2              | 4/7/2006                  | Female        | BSLT                      | 88 days         | Infection: Pseudomonal Sepsis      |
| 3              | 11/21/2001                | Male          | SLT                       | 92 days         | Respiratory failure                |
| 4              | 10/30/2005                | Male          | BSLT                      | 120 days        | Infection: Pseudomonas Bacteremia  |
| 5              | 09/21/07                  | Male          | BSLT                      | 151 days        | Bacterial septicemia               |
| 6              | 11/12/1998                | Male          | SLT                       | 5.6 months      | Respiratory failure                |
| 7              | 1/19/2014                 | Female        | BSLT                      | 6.4 months      | Respiratory failure                |
| 8              | 1/26/2014                 | Male          | BSLT                      | 7.4 months      | Unknown                            |
| 9              | 2/25/1997                 | Female        | SLT                       | 9.3 months      | Graft failure: non-specific        |
| 10             | 4/18/2012                 | Male          | BSLT                      | 9.4 months      | CMV Infection                      |
| 11             | 5/9/2008                  | Female        | BSLT                      | 11.9 months     | Graft failure: graft infection     |
| 12             | 10/18/2007                | Male          | BSLT                      | 1.1 years       | Respiratory failure                |
| 14             | 8/21/1993                 | Male          | BSLT                      | 1.2 years       | BOS                                |
| 15             | 9/20/2008                 | Male          | BSLT                      | 1.3 years       | Unknown                            |
| 16             | 6/26/2009                 | Female        | BSLT                      | 1.4 years       | BOS                                |
| 16             | 12/13/2005                | Female        | SLT                       | 1.6 years       | Metastatic Liver Cancer            |
| 17             | 06/24/07                  | Male          | BSLT                      | 1.6 years       | Cardiovascular: Other              |
| 18             | 1/24/2005                 | Female        | BSLT                      | 1.8 years       | Cardiovascular: cardiac arrest     |
| 19             | 7/16/2010                 | Male          | BSLT                      | 1.9 years       | BOS                                |
| 20             | 12/9/2007                 | Male          | BSLT                      | 2.1 years       | Cerebrovascular: Stroke            |
| 21             | 6/5/2005                  | Male          | BSLT                      | 2.2 years       | Infection: bacterial septicemia    |
| 22             | 7/13/2011                 | Male          | BSLT                      | 2.4 years       | BOS                                |
| 23             | 06/18/10                  | Male          | BSLT                      | 2.4 years       | Multiple organ failure             |
| 24             | 1/14/2003                 | Female        | SLT                       | 2.4 years       | BOS                                |
| 25             | 3/7/2005                  | Female        | BSLT                      | 2.5 years       | Graft failure: graft infection     |
| 26             | 12/19/2002                | Male          | BSLT                      | 2.9 years       | BOS                                |
| 27             | 5/19/2013                 | Female        | BSLT                      | 3.1 years       | BOS                                |
| 28             | 10/2/2008                 | Female        | BSLT                      | 3.6 years       | Acute respiratory distress disease |
| 29             | 4/10/2007                 | Male          | BSLT                      | 3.9 years       | Respiratory failure                |
| 30             | 1/26/2013                 | Male          | BSLT                      | 4 years         | Unknown                            |
| 31             | 1/22/2013                 | Male          | BSLT                      | 4.1 years       | BOS                                |
| 32             | 3/14/1999                 | Female        | BSLT                      | 4.2 years       | BOS                                |
| 33             | 9/13/2000                 | Female        | SLT                       | 4.4 years       | Respiratory failure                |
| 34             | 5/31/1998                 | Male          | SLT                       | 4.5 years       | BOS                                |
| 35             | 1/10/2006                 | Female        | BSLT                      | 4.7 years       | Suicide                            |
| 36             | 09/10/12                  | Male          | BSLT                      | 4.9 years       | BOS                                |
| 37             | 10/26/2011                | Male          | BSLT                      | 5.1 years       | Acute rejection                    |
| 38             | 4/6/2002                  | Female        | SLT                       | 5.3 years       | Unknown                            |
| 39             | 10/6/2002                 | Female        | SLT                       | 5.4 years       | BOS                                |
| 40             | 7/1/2008                  | Male          | BSLT                      | 5.6 years       | BOS                                |
| 41             | 3/12/2008                 | Female        | BSLT                      | 6.2 years       | Acute respiratory distress disease |



|    |            |        |      |            |                                     |
|----|------------|--------|------|------------|-------------------------------------|
| 42 | 6/15/1998  | Female | SLT  | 6.8 years  | Infection: Disseminated Aspergillus |
| 43 | 8/9/2006   | Male   | BSLT | 7 years    | Unknown                             |
| 44 | 4/18/2001  | Male   | BSLT | 7.1 years  | PTLD                                |
| 45 | 11/14/07   | Male   | BSLT | 9.3 years  | Missing                             |
| 46 | 10/13/1998 | Female | SLT  | 9.3 years  | Respiratory failure                 |
| 47 | 11/10/1997 | Male   | BSLT | 9.7 years  | Respiratory failure                 |
| 48 | 1/17/2006  | Male   | BSLT | 10.5 years | Unknown                             |
| 49 | 8/18/2005  | Female | SLT  | 11.1 years | BOS                                 |
| 50 | 11/21/2002 | Female | BSLT | 11.8 years | Acute rejection                     |
| 51 | 8/2/2001   | Female | SLT  | 12.7 years | Respiratory hemorrhage              |

There were a total of 51 deaths in our cohort. Primary cause of death was reported to the OPTN/UNOS database by the individual institutions. For patients 16 and 39 there was no primary cause of death listed, so secondary cause of death was used instead.

**Abbreviations:** CMV = cytomegalovirus, BOS= bronchiolitis obliterans syndrome, BSLT = bilateral sequential lung transplantation, MI = myocardial infarction, PTLD = post-transplant lymphoproliferative disorder, SLT = single lung transplantation.
